# Supplementary material
Source: publisher site journal article supplement (https://www.dovepress.com/article/262909)
Supplement: Supplementary file 1 [file get_supplementary_file.php]

**Supplementary Table 1. Analyze the relationship between SNX family and CD8 T** **cells in lung adenocarcinoma (GEPIA)**

| **Correlated Gene** | **Spearman's Correlation** | ***p*-Value** |
| --- | --- | --- |
| ***SNX20*** | 0.62 | 4.90E-53 |
| ***SNX10*** | 0.47 | 2.30E-27 |
| ***SNX6*** | 0.2 | 1.50E-05 |
| ***SNX3*** | 0.19 | 1.90E-05 |
| ***SNX2*** | 0.17 | 1.90E-04 |
| ***SNX11*** | 0.16 | 2.90E-04 |
| ***SNX8*** | 0.13 | 5.40E-03 |
| ***SNX18*** | 0.12 | 0.008 |
| ***SNX23*** | -0.1 | 0.028 |
| ***SNX22*** | 0.096 | 0.035 |
| ***SNX24*** | 0.095 | 0.038 |
| ***SNX26*** | 0.083 | 0.069 |
| ***SNX15*** | 0.075 | 0.098 |
| ***SNX25*** | -0.049 | 0.28 |
| ***SNX1*** | -0.048 | 0.29 |
| ***SNX12*** | -0.041 | 0.36 |
| ***SNX7*** | 0.04 | 0.39 |
| ***SNX19*** | 0.036 | 0.43 |
| ***SNX16*** | 0.028 | 0.54 |
| ***SNX27*** | -0.028 | 0.54 |
| ***SNX13*** | -0.025 | 0.58 |
| ***SNX5*** | -0.024 | 0.6 |
| ***SNX4*** | 0.02 | 0.67 |
| ***SNX14*** | 0.013 | 0.78 |
| ***SNX17*** | 0.012 | 0.79 |
| ***SNX21*** | 0.011 | 0.81 |
| ***SNX9*** | 0.0095 | 0.84 |

GEPIA: Gene Expression Profiling Interactive Analysis; SNX: Sorting nexin.


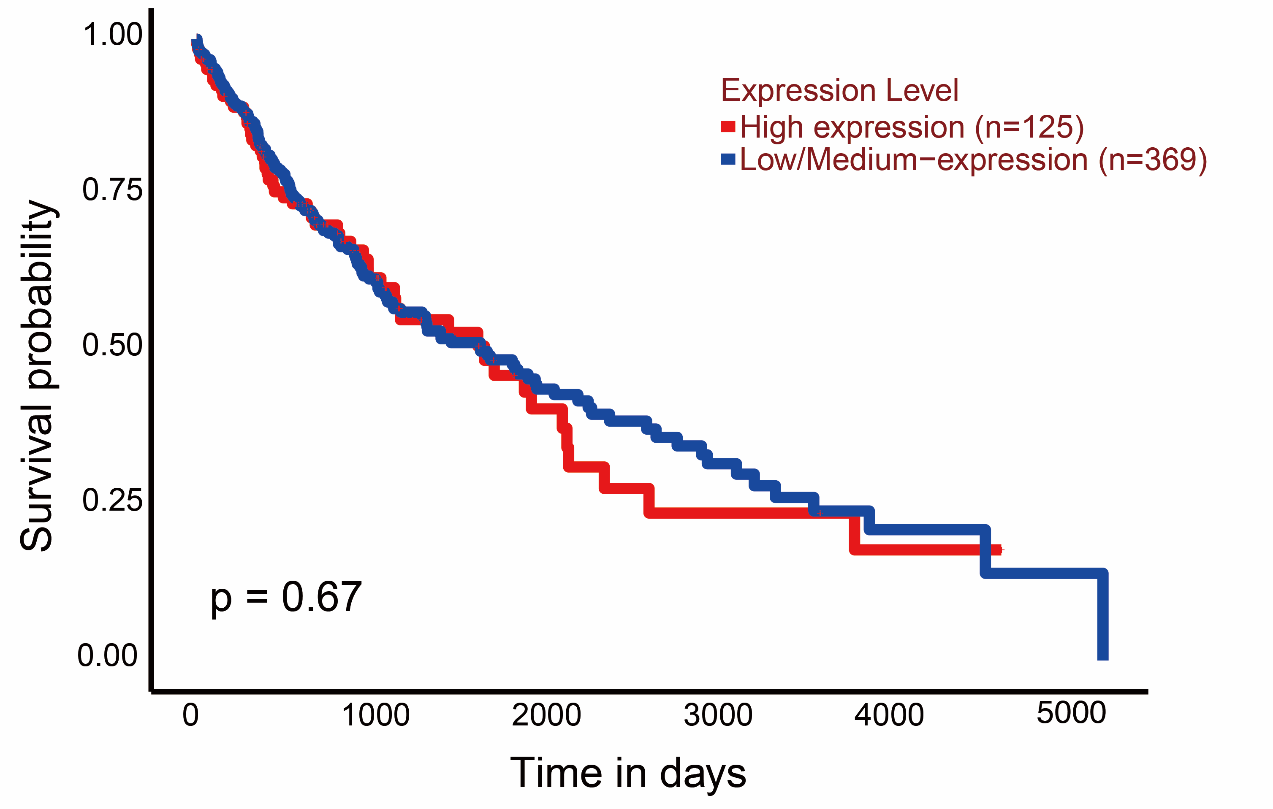


**Supplementary Figure 1. Overall survival curve comparing the high and low/median expression of SNX20 in lung squamous cell carcinoma.** SNX20:Sorting nexin 20.


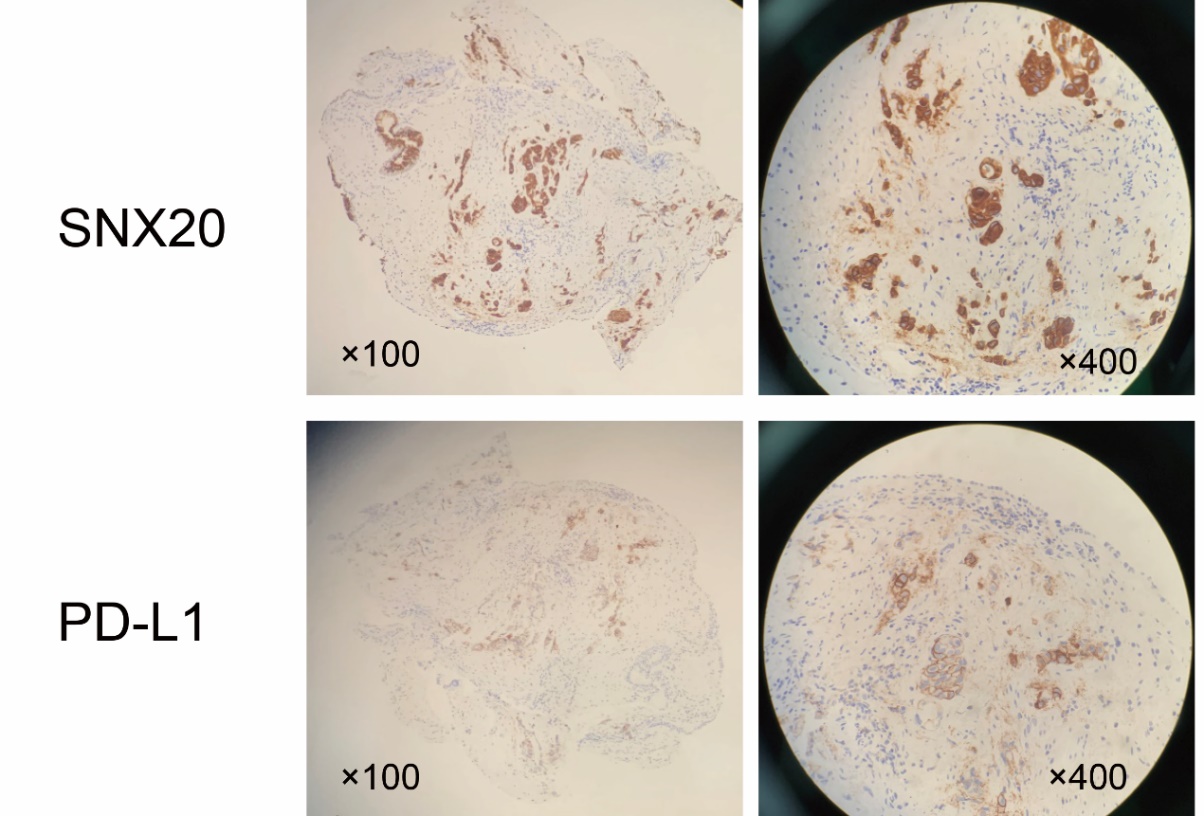


**Supplementary Figure 2. The distribution of SNX20 and PD-L1 in lung adenocarcinoma tissues.** PD-L1: Programmed death ligand 1; SNX20:Sorting nexin 20.
